# Supplementary material for: Farnesyl diphosphate synthase is important for the maintenance of glioblastoma stemness
Source: PubMed Central journal article supplement (PMC6193020; doi:10.1038/s12276-018-0166-2), 2018-10-17
Supplement: 12276_2018_166_MOESM1_ESM.pdf [file 12276_2018_166_MOESM1_ESM.pdf]

# Supplementary Information

## Farnesyl diphosphate synthase is important for the maintenance of glioblastoma stemness

Hee Yeon Kim<sup>1,2</sup>, Dong Keon Kim<sup>1,3</sup>, Seung-Hyun Bae<sup>1</sup>, HyeRan Gwak<sup>1</sup>, Ji Hoon Jeon<sup>1</sup>, Jong Kwang Kim<sup>1</sup>, Byung Il Lee<sup>1,2</sup>, Hye Jin You<sup>1,2</sup>, Dong Hoon Shin<sup>1,2</sup>, Young-Ho Kim<sup>1</sup>, Soo Youl Kim<sup>1</sup>, Sung-Sik Han<sup>4</sup>, Jin-Kyoung Shim<sup>5</sup>, Ji-Hyun Lee<sup>5</sup>, Seok-Gu Kang<sup>5</sup>, and Hyonchol Jang<sup>1,2,\*</sup>

### Supplementary Tables

Supplementary Table 1 (related to Figure 1). Gene sets used in the gene set enrichment analysis for Figure 1c.

Supplementary Table 2 (related to Figure 2). Differentially expressed genes between TS13-20 tumor spheres and its differentiated counterpart.

Supplementary Table 3 (related to Figure 5). Differentially expressed genes between TS13-20 tumor spheres treated with or without alendronate.
